# Supplementary material for: A physical activity, nutrition and oral health intervention in nursery settings: process evaluation of the NAP SACC UK feasibility cluster RCT
Source: PubMed Central journal article supplement (PMC6609387; doi:10.1186/s12889-019-7102-9), 2019-07-03
Supplement: 12889_2019_7102_MOESM1_ESM.pdf [file 12889_2019_7102_MOESM1_ESM.pdf]

## Logic Model: NAP SACC UK

### Household and nursery environment characteristics

**Socio-demographic factors for the child and family:** area-level deprivation (IMD Score using home postcode); gender; ethnicity

**Nursery environment factors self-reported by nursery:** nursery policy to promote healthy eating and physical activity and reduce sedentary behaviours; external initiatives to promote healthy eating and physical activity and/or reduce sedentary behaviour

**Nursery factors reported on national website:** Ofsted school performance factors

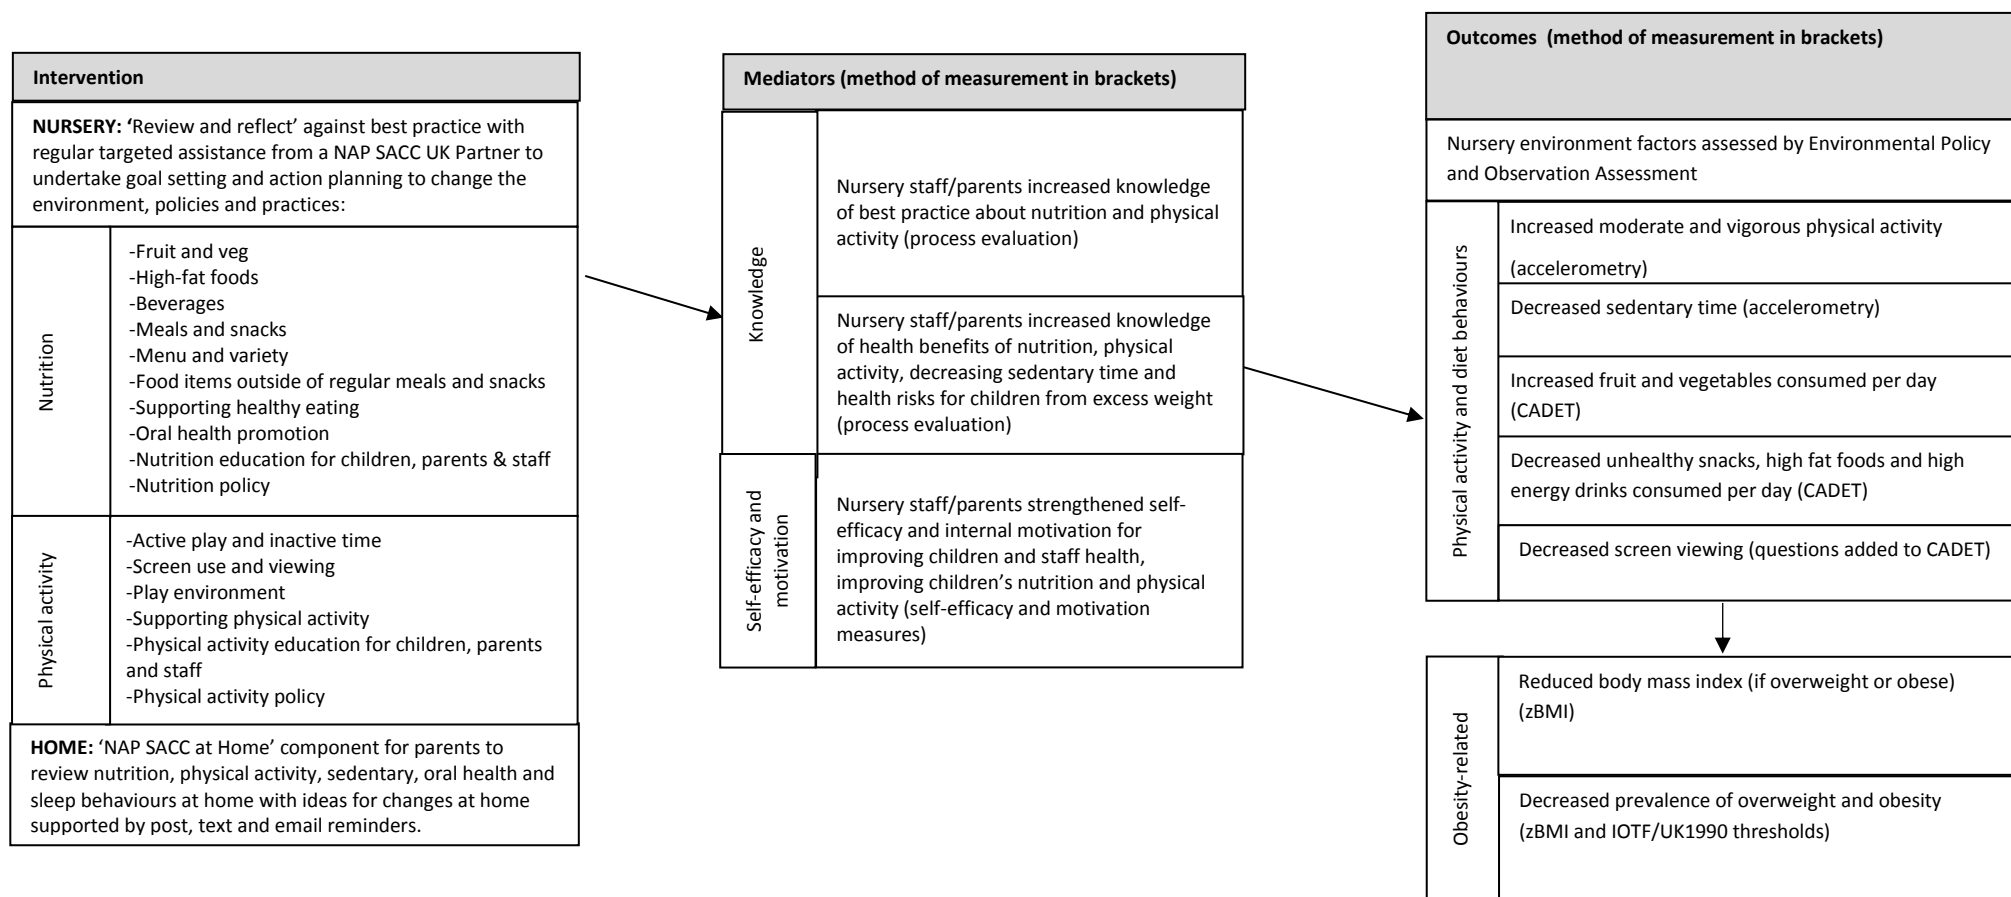

### Guidance and policy context

Eat Better Start Better; Change4Life; Food and Health Guidelines for early years and childcare settings; Start Active, Stay Active: a report on physical activity for health from the four home countries' Chief Medical Officers
